# Supplementary material for: Quality of Life of Cancer Patients during Chemotherapy in Indonesia: A Comparison of EORTC QLQ-C30 and EQ-5D-5L, Based on Patients’ Characteristics
Source: Hindawi journal article supplement (doi:10.1155/2023/9357299), 2023-03-03
Supplement: f1 [file 9357299.f1.pdf]

| Jenis Kelamin (Sex); | Usia (tahun); | Age (ye | Diagnosa  | Stadium | Kanker (can | Biaya (Health | insuran |
|----------------------|---------------|---------|-----------|---------|-------------|---------------|---------|
| P                    | 2             | 36      | 1 Ca Mamm | 1       | 2           | 1 BPJS        | 1       |
| P                    | 2             | 47      | 1 Ca Mamm | 1       | 3           | 2 BPJS        | 1       |
| P                    | 2             | 46      | 1 Ca Mamm | 1       | 2           | 1 BPJS        | 1       |
| P                    | 2             | 45      | 1 Ca Mamm | 1       | 4           | 2 BPJS        | 1       |
| P                    | 2             | 47      | 1 Ca Mamm | 1       | 2           | 1 BPJS        | 1       |
| P                    | 2             | 45      | 1 Ca Mamm | 1       | 3           | 2 BPJS        | 1       |
| P                    | 2             | 43      | 1 Ca Mamm | 1       | 3           | 2 BPJS        | 1       |
| P                    | 2             | 54      | 1 Ca Mamm | 1       | 4           | 2 BPJS        | 1       |
| P                    | 2             | 47      | 1 Ca Mamm | 1       | 1           | 1 BPJS        | 1       |
| P                    | 2             | 37      | 1 Ca Mamm | 1       | 3           | 2 BPJS        | 1       |
| P                    | 2             | 50      | 1 Ca Mamm | 1       | 2           | 1 BPJS        | 1       |
| P                    | 2             | 57      | 1 Ca Mamm | 1       | 3           | 2 BPJS        | 1       |
| P                    | 2             | 30      | 1 Ca Mamm | 1       | 2           | 1 BPJS        | 1       |
| P                    | 2             | 32      | 1 Ca Mamm | 1       | 3           | 2 BPJS        | 1       |
| P                    | 2             | 60      | 1 Ca Mamm | 1       | 2           | 1 BPJS        | 1       |
| P                    | 2             | 58      | 1 Ca Mamm | 1       | 2           | 1 BPJS        | 1       |
| P                    | 2             | 41      | 1 Ca Mamm | 1       | 3           | 2 BPJS        | 1       |
| P                    | 2             | 45      | 1 Ca Mamm | 1       | 2           | 1 BPJS        | 1       |
| P                    | 2             | 42      | 1 Ca Mamm | 1       | 4           | 2 BPJS        | 1       |
| P                    | 2             | 50      | 1 Ca Mamm | 1       | 2           | 1 BPJS        | 1       |
| P                    | 2             | 37      | 1 Ca Mamm | 1       | 3           | 2 BPJS        | 1       |
| P                    | 2             | 44      | 1 Ca Mamm | 1       | 2           | 1 BPJS        | 1       |
| P                    | 2             | 64      | 2 Ca Mamm | 1       | 2           | 1 BPJS        | 1       |
| P                    | 2             | 46      | 1 Ca Mamm | 1       | 2           | 1 BPJS        | 1       |
| P                    | 2             | 57      | 1 Ca Mamm | 1       | 2           | 1 BPJS        | 1       |
| P                    | 2             | 53      | 1 Ca Mamm | 1       | 3           | 2 BPJS        | 1       |
| P                    | 2             | 58      | 1 Ca Mamm | 1       | 2           | 1 BPJS        | 1       |
| P                    | 2             | 39      | 1 Ca Mamm | 1       | 4           | 2 BPJS        | 1       |
| P                    | 2             | 40      | 1 Ca Mamm | 1       | 4           | 2 BPJS        | 1       |
| P                    | 2             | 46      | 1 Ca Mamm | 1       | 4           | 2 BPJS        | 1       |
| P                    | 2             | 43      | 1 Ca Mamm | 1       | 4           | 2 BPJS        | 1       |
| P                    | 2             | 67      | 2 Ca Mamm | 1       | 2           | 1 BPJS        | 1       |
| P                    | 2             | 47      | 1 Ca Mamm | 1       | 2           | 1 BPJS        | 1       |
| P                    | 2             | 39      | 1 Ca Mamm | 1       | 4           | 2 BPJS        | 1       |
| P                    | 2             | 73      | 2 Ca Mamm | 1       | 3           | 2 BPJS        | 1       |
| P                    | 2             | 42      | 1 Ca Mamm | 1       | 4           | 2 BPJS        | 1       |
| P                    | 2             | 54      | 1 Ca Mamm | 1       | 2           | 1 BPJS        | 1       |
| P                    | 2             | 40      | 1 Ca Mamm | 1       | 2           | 1 BPJS        | 1       |
| P                    | 2             | 50      | 1 Ca Mamm | 1       | 4           | 2 BPJS        | 1       |
| P                    | 2             | 40      | 1 Ca Mamm | 1       | 1           | 1 BPJS        | 1       |
| P                    | 2             | 56      | 1 Ca Mamm | 1       | 3           | 2 BPJS        | 1       |
| P                    | 2             | 48      | 1 Ca Mamm | 1       | 1           | 1 BPJS        | 1       |
| P                    | 2             | 49      | 1 Ca Mamm | 1       | 4           | 2 BPJS        | 1       |
| P                    | 2             | 46      | 1 Ca Mamm | 1       | 3           | 2 BPJS        | 1       |
| P                    | 2             | 35      | 1 Ca Mamm | 1       | 2           | 1 BPJS        | 1       |
| P                    | 2             | 42      | 1 Ca Mamm | 1       | 2           | 1 BPJS        | 1       |

|   |   |    |              |   |   |        |   |
|---|---|----|--------------|---|---|--------|---|
| P | 2 | 47 | 1 Ca Mamm    | 1 | 2 | 1 BPJS | 1 |
| P | 2 | 39 | 1 Ca Mamm    | 1 | 2 | 1 BPJS | 1 |
| P | 2 | 55 | 1 Ca Mamm    | 1 | 2 | 1 BPJS | 1 |
| P | 2 | 52 | 1 Ca Mamm    | 1 | 4 | 2 BPJS | 1 |
| P | 2 | 36 | 1 Ca Mamm    | 1 | 3 | 2 BPJS | 1 |
| P | 2 | 31 | 1 Ca Mamm    | 1 | 3 | 2 BPJS | 1 |
| P | 2 | 42 | 1 Ca Mamm    | 1 | 2 | 1 BPJS | 1 |
| P | 2 | 52 | 1 Ca Mamm    | 1 | 2 | 1 BPJS | 1 |
| P | 2 | 54 | 1 Ca Mamm    | 1 | 3 | 2 BPJS | 1 |
| P | 2 | 50 | 1 Ca Mamm    | 1 | 2 | 1 BPJS | 1 |
| P | 2 | 30 | 1 Ca Mamm    | 1 | 2 | 1 BPJS | 1 |
| P | 2 | 49 | 1 Ca Mamm    | 1 | 2 | 1 BPJS | 1 |
| P | 2 | 52 | 1 Ca Mamm    | 1 | 3 | 2 BPJS | 1 |
| P | 2 | 49 | 1 Ca Mamm    | 1 | 4 | 2 BPJS | 1 |
| P | 2 | 32 | 1 Ca Mamm    | 1 | 2 | 1 BPJS | 1 |
| P | 2 | 54 | 1 Ca Mamm    | 1 | 4 | 2 BPJS | 1 |
| P | 2 | 31 | 1 Ca Mamm    | 1 | 2 | 1 BPJS | 1 |
| P | 2 | 52 | 1 Ca Mamm    | 1 | 3 | 2 BPJS | 1 |
| P | 2 | 61 | 2 Ca Mamm    | 1 | 2 | 1 BPJS | 1 |
| L | 1 | 52 | 1 Ca Nasofa  | 2 | 4 | 2 BPJS | 1 |
| L | 1 | 20 | 1 Ca Nasofa  | 2 | 4 | 2 BPJS | 1 |
| P | 2 | 44 | 1 Ca Nasofa  | 2 | 3 | 2 BPJS | 1 |
| L | 1 | 68 | 2 Ca Nasofa  | 2 | 4 | 2 BPJS | 1 |
| L | 1 | 32 | 1 Ca Nasofa  | 2 | 4 | 2 BPJS | 1 |
| L | 1 | 35 | 1 Ca Nasofa  | 2 | 3 | 2 BPJS | 1 |
| L | 1 | 60 | 1 Ca Nasofa  | 2 | 3 | 2 BPJS | 1 |
| P | 2 | 50 | 1 Ca Nasofa  | 2 | 3 | 2 BPJS | 1 |
| L | 1 | 51 | 1 Ca Nasofa  | 2 | 4 | 2 BPJS | 1 |
| L | 1 | 39 | 1 Ca Nasofa  | 2 | 3 | 2 BPJS | 1 |
| L | 1 | 51 | 1 Ca Nasofa  | 2 | 4 | 2 BPJS | 1 |
| P | 2 | 54 | 1 Ca Nasofa  | 2 | 4 | 2 BPJS | 1 |
| P | 2 | 57 | 1 Ca Nasofa  | 2 | 4 | 2 BPJS | 1 |
| L | 1 | 44 | 1 Ca Nasofa  | 2 | 4 | 2 BPJS | 1 |
| P | 2 | 42 | 1 Ca Nasofa  | 2 | 4 | 2 BPJS | 1 |
| L | 1 | 54 | 1 Ca Nasofa  | 2 | 3 | 2 BPJS | 1 |
| P | 2 | 46 | 1 Ca Nasofa  | 2 | 3 | 2 BPJS | 1 |
| L | 1 | 60 | 1 Ca Nasofa  | 2 | 4 | 2 BPJS | 1 |
| L | 1 | 58 | 1 Ca Nasofa  | 2 | 4 | 2 BPJS | 1 |
| P | 2 | 24 | 1 Ca Nasofa  | 2 | 3 | 2 BPJS | 1 |
| P | 2 | 45 | 1 Ca Colorec | 3 | 4 | 2 BPJS | 1 |
| L | 1 | 62 | 2 Ca Colorec | 3 | 4 | 2 BPJS | 1 |
| P | 2 | 50 | 1 Ca Colorec | 3 | 3 | 2 BPJS | 1 |
| P | 2 | 47 | 1 Ca Colorec | 3 | 3 | 2 BPJS | 1 |
| P | 2 | 62 | 2 Ca Colorec | 3 | 4 | 2 BPJS | 1 |
| P | 2 | 40 | 1 Ca Colorec | 3 | 4 | 2 BPJS | 1 |
| L | 1 | 52 | 1 Ca Colorec | 3 | 4 | 2 BPJS | 1 |
| L | 1 | 60 | 1 Ca Colorec | 3 | 4 | 2 BPJS | 1 |

|   |   |    |              |   |   |        |   |
|---|---|----|--------------|---|---|--------|---|
| L | 1 | 64 | 2 Ca Colorec | 3 | 4 | 2 BPJS | 1 |
| P | 2 | 51 | 1 Ca Colorec | 3 | 4 | 2 BPJS | 1 |
| P | 2 | 63 | 2 Ca Colorec | 3 | 4 | 2 BPJS | 1 |
| L | 1 | 56 | 1 Ca Colorec | 3 | 4 | 2 BPJS | 1 |
| L | 1 | 21 | 1 Ca Colorec | 3 | 3 | 2 BPJS | 1 |
| P | 2 | 26 | 1 Ca Colorec | 3 | 3 | 2 BPJS | 1 |
| P | 2 | 53 | 1 Ca Colorec | 3 | 4 | 2 BPJS | 1 |
| L | 1 | 61 | 2 Ca Colorec | 3 | 2 | 1 BPJS | 1 |
| P | 2 | 59 | 1 Ca Colorec | 3 | 4 | 2 BPJS | 1 |
| L | 1 | 51 | 1 Ca Colorec | 3 | 4 | 2 BPJS | 1 |
| L | 1 | 50 | 1 Ca Colorec | 3 | 3 | 2 BPJS | 1 |
| L | 1 | 48 | 1 Ca Colorec | 3 | 4 | 2 BPJS | 1 |
| P | 2 | 55 | 1 Ca Colorec | 3 | 2 | 1 BPJS | 1 |
| P | 2 | 63 | 2 Ca Colorec | 3 | 4 | 2 BPJS | 1 |
| P | 2 | 55 | 1 Ca Colorec | 3 | 3 | 2 BPJS | 1 |
| L | 1 | 43 | 1 Ca Colorec | 3 | 4 | 2 BPJS | 1 |
| P | 2 | 47 | 1 Ca Colorec | 3 | 3 | 2 BPJS | 1 |
| P | 2 | 66 | 2 Ca Colorec | 3 | 3 | 2 BPJS | 1 |
| P | 2 | 52 | 1 Ca Colorec | 3 | 3 | 2 BPJS | 1 |
| L | 1 | 31 | 1 Ca Colorec | 3 | 4 | 2 BPJS | 1 |
| L | 1 | 48 | 1 Ca Colorec | 3 | 4 | 2 BPJS | 1 |
| P | 2 | 55 | 1 Ca Colorec | 3 | 3 | 2 BPJS | 1 |
| P | 2 | 39 | 1 Ca Colorec | 3 | 4 | 2 BPJS | 1 |
| P | 2 | 26 | 1 Ca Colorec | 3 | 3 | 2 BPJS | 1 |
| L | 1 | 26 | 1 Ca Colorec | 3 | 4 | 2 BPJS | 1 |
| L | 1 | 45 | 1 Ca Colorec | 3 | 4 | 2 BPJS | 1 |
| L | 1 | 54 | 1 Ca Colorec | 3 | 4 | 2 BPJS | 1 |
| L | 1 | 50 | 1 Ca Colorec | 3 | 4 | 2 BPJS | 1 |
| P | 2 | 51 | 1 Ca Colorec | 3 | 4 | 2 BPJS | 1 |
| P | 2 | 49 | 1 Ca Colorec | 3 | 3 | 2 BPJS | 1 |
| L | 1 | 48 | 1 Ca Colorec | 3 | 4 | 2 BPJS | 1 |
| L | 1 | 52 | 1 Ca Colorec | 3 | 4 | 2 BPJS | 1 |
| L | 1 | 39 | 1 Ca Colorec | 3 | 4 | 2 BPJS | 1 |
| L | 1 | 42 | 1 Ca Colorec | 3 | 4 | 2 BPJS | 1 |
| P | 2 | 52 | 1 Ca Colorec | 3 | 3 | 2 BPJS | 1 |
| L | 1 | 46 | 1 Ca Colorec | 3 | 4 | 2 BPJS | 1 |
| L | 1 | 45 | 1 Ca Colorec | 3 | 3 | 2 BPJS | 1 |
| P | 2 | 34 | 1 Ca Colorec | 3 | 3 | 2 BPJS | 1 |
| L | 1 | 45 | 1 Ca Colorec | 3 | 4 | 2 BPJS | 1 |
| L | 1 | 31 | 1 Ca Colorec | 3 | 4 | 2 BPJS | 1 |
| P | 2 | 39 | 1 Ca Colorec | 3 | 3 | 2 BPJS | 1 |
| L | 1 | 54 | 1 Ca Colorec | 3 | 4 | 2 BPJS | 1 |
| L | 1 | 45 | 1 Ca Colorec | 3 | 4 | 2 BPJS | 1 |
| L | 1 | 31 | 1 Ca Colorec | 3 | 4 | 2 BPJS | 1 |
| P | 2 | 36 | 1 Ca Colorec | 3 | 4 | 2 BPJS | 1 |
| P | 2 | 39 | 1 Ca Colorec | 3 | 3 | 2 BPJS | 1 |
| P | 2 | 38 | 1 Ca Colorec | 3 | 4 | 2 BPJS | 1 |

|   |   |    |              |   |   |        |   |
|---|---|----|--------------|---|---|--------|---|
| L | 1 | 37 | 1 Ca Colorec | 3 | 4 | 2 BPJS | 1 |
| L | 1 | 55 | 1 Ca Colorec | 3 | 3 | 2 BPJS | 1 |
| P | 2 | 55 | 1 Ca Mamm    | 1 | 2 | 1 BPJS | 1 |
| P | 2 | 52 | 1 Ca Mamm    | 1 | 3 | 2 BPJS | 1 |
| P | 2 | 59 | 1 Ca Mamm    | 1 | 2 | 1 BPJS | 1 |
| P | 2 | 32 | 1 Ca Mamm    | 1 | 2 | 1 BPJS | 1 |
| P | 2 | 55 | 1 Ca Mamm    | 1 | 4 | 2 BPJS | 1 |
| P | 2 | 37 | 1 Ca Mamm    | 1 | 3 | 2 BPJS | 1 |
| P | 2 | 46 | 1 Ca Mamm    | 1 | 3 | 2 BPJS | 1 |
| L | 1 | 54 | 1 Ca Colorec | 3 | 3 | 2 BPJS | 1 |
| P | 2 | 58 | 1 Ca Mamm    | 1 | 2 | 1 BPJS | 1 |
| L | 1 | 39 | 1 Ca Colorec | 3 | 4 | 2 BPJS | 1 |
| P | 2 | 59 | 1 Ca Mamm    | 1 | 2 | 1 Umum | 2 |
| L | 1 | 49 | 1 Ca Colorec | 3 | 3 | 2 BPJS | 1 |
| P | 2 | 59 | 1 Ca Colorec | 3 | 4 | 2 BPJS | 1 |
| L | 1 | 67 | 2 Ca Colorec | 3 | 4 | 2 BPJS | 1 |
| P | 2 | 63 | 2 Ca Colorec | 3 | 4 | 2 BPJS | 1 |
| L | 1 | 53 | 1 Ca Nasofa  | 2 | 4 | 2 BPJS | 1 |
| P | 2 | 41 | 1 Ca Mamm    | 1 | 4 | 2 BPJS | 1 |
| P | 2 | 46 | 1 Ca Colorec | 3 | 2 | 1 BPJS | 1 |
| P | 2 | 45 | 1 Ca Mamm    | 1 | 3 | 2 BPJS | 1 |
| P | 2 | 38 | 1 Ca Mamm    | 1 | 2 | 1 BPJS | 1 |
| P | 2 | 36 | 1 Ca Colorec | 3 | 4 | 2 BPJS | 1 |
| L | 1 | 49 | 1 Ca Colorec | 3 | 2 | 1 BPJS | 1 |
| P | 2 | 37 | 1 Ca Mamm    | 1 | 2 | 1 BPJS | 1 |
| P | 2 | 46 | 1 Ca Colorec | 3 | 4 | 2 Umum | 2 |
| P | 2 | 61 | 2 Ca Mamm    | 1 | 2 | 1 BPJS | 1 |
| L | 1 | 45 | 1 Ca Nasofa  | 2 | 4 | 2 BPJS | 1 |
| L | 1 | 39 | 1 Ca Nasofa  | 2 | 4 | 2 BPJS | 1 |
| P | 2 | 63 | 2 Ca Mamm    | 1 | 2 | 1 BPJS | 1 |
| P | 2 | 47 | 1 Ca Nasofa  | 2 | 3 | 2 BPJS | 1 |
| P | 2 | 55 | 1 Ca Mamm    | 1 | 4 | 2 BPJS | 1 |
| P | 2 | 61 | 2 Ca Colorec | 3 | 4 | 2 BPJS | 1 |
| P | 2 | 38 | 1 Ca Mamm    | 1 | 4 | 2 BPJS | 1 |
| L | 1 | 41 | 1 Ca Nasofa  | 3 | 4 | 2 BPJS | 1 |
| P | 2 | 61 | 2 Ca Nasofa  | 3 | 3 | 2 BPJS | 1 |
| P | 2 | 55 | 1 Ca Colorec | 3 | 4 | 2 BPJS | 1 |
| L | 1 | 69 | 2 Ca Nasofa  | 2 | 4 | 2 BPJS | 1 |
| P | 2 | 32 | 1 Ca Mamm    | 1 | 3 | 2 BPJS | 1 |
| P | 2 | 36 | 1 Ca Mamm    | 1 | 2 | 1 BPJS | 1 |
| L | 1 | 58 | 1 Ca Colorec | 3 | 4 | 2 BPJS | 1 |
| P | 2 | 55 | 1 Ca Colorec | 3 | 4 | 2 BPJS | 1 |
| L | 1 | 61 | 2 Ca Nasofa  | 2 | 4 | 2 BPJS | 1 |
| P | 2 | 24 | 1 Ca Colorec | 3 | 4 | 2 BPJS | 1 |
| P | 2 | 52 | 1 Ca Mamm    | 1 | 2 | 1 BPJS | 1 |
| P | 2 | 59 | 1 Ca Mamm    | 1 | 4 | 2 BPJS | 1 |
| L | 1 | 22 | 1 Ca Colorec | 3 | 4 | 2 BPJS | 1 |

|   |   |    |              |   |   |        |   |
|---|---|----|--------------|---|---|--------|---|
| P | 2 | 59 | 1 Ca Mamm    | 1 | 2 | 1 BPJS | 1 |
| P | 2 | 49 | 1 Ca Nasofa  | 2 | 4 | 2 BPJS | 1 |
| P | 2 | 47 | 1 Ca Colorec | 3 | 4 | 2 BPJS | 1 |
| P | 2 | 53 | 1 Ca Mamm    | 1 | 2 | 1 BPJS | 1 |
| P | 2 | 59 | 1 Ca Mamm    | 1 | 4 | 2 BPJS | 1 |
| P | 2 | 62 | 2 Ca Mamm    | 1 | 3 | 2 BPJS | 1 |
| L | 1 | 26 | 1 Ca Nasofa  | 2 | 4 | 2 BPJS | 1 |
| P | 2 | 50 | 1 Ca Colorec | 3 | 3 | 2 BPJS | 1 |
| P | 2 | 59 | 1 Ca Colorec | 3 | 4 | 2 BPJS | 1 |
| P | 2 | 36 | 1 Ca Colorec | 3 | 4 | 2 BPJS | 1 |
| L | 1 | 48 | 1 Ca Nasofa  | 2 | 4 | 2 BPJS | 1 |
| P | 2 | 59 | 1 Ca Colorec | 3 | 4 | 2 BPJS | 1 |
| P | 2 | 60 | 1 Ca Colorec | 3 | 4 | 2 BPJS | 1 |
| P | 2 | 38 | 1 Ca Mamm    | 1 | 3 | 2 BPJS | 1 |
| P | 2 | 41 | 1 Ca Mamm    | 1 | 3 | 2 BPJS | 1 |
| P | 2 | 55 | 1 Ca Mamm    | 1 | 2 | 1 BPJS | 1 |
| P | 2 | 60 | 1 Ca Colorec | 3 | 4 | 2 BPJS | 1 |
| P | 2 | 22 | 1 Ca Colorec | 3 | 4 | 2 BPJS | 1 |
| P | 2 | 64 | 2 Ca Colorec | 3 | 4 | 2 BPJS | 1 |
| L | 1 | 34 | 1 Ca Colorec | 3 | 4 | 2 BPJS | 1 |
| P | 2 | 37 | 1 Ca Mamm    | 1 | 2 | 1 BPJS | 1 |
| P | 2 | 55 | 1 Ca Mamm    | 1 | 2 | 1 BPJS | 1 |
| L | 1 | 61 | 2 Ca Nasofa  | 2 | 4 | 2 BPJS | 1 |
| P | 2 | 35 | 1 Ca Mamm    | 1 | 3 | 2 BPJS | 1 |
| P | 2 | 33 | 1 Ca Mamm    | 1 | 4 | 2 BPJS | 1 |
| P | 2 | 60 | 1 Ca Mamm    | 1 | 4 | 2 BPJS | 1 |
| P | 2 | 40 | 1 Ca Mamm    | 1 | 4 | 2 BPJS | 1 |
| P | 2 | 54 | 1 Ca Colorec | 3 | 3 | 2 BPJS | 1 |
| P | 2 | 66 | 2 Ca Mamm    | 1 | 4 | 2 BPJS | 1 |
| P | 2 | 50 | 1 Ca Mamm    | 1 | 4 | 2 BPJS | 1 |
| P | 2 | 40 | 1 Ca Mamm    | 1 | 4 | 2 BPJS | 1 |
| P | 2 | 42 | 1 Ca Nasofa  | 2 | 4 | 2 BPJS | 1 |
| P | 2 | 34 | 1 Ca Mamm    | 1 | 4 | 2 BPJS | 1 |
| P | 2 | 53 | 1 Ca Mamm    | 1 | 2 | 1 BPJS | 1 |
| P | 2 | 57 | 1 Ca Mamm    | 1 | 3 | 2 BPJS | 1 |
| P | 2 | 57 | 1 Ca Mamm    | 1 | 2 | 1 BPJS | 1 |
| L | 1 | 33 | 1 Ca Nasofa  | 2 | 3 | 2 BPJS | 1 |
| L | 1 | 49 | 1 Ca Colorec | 3 | 3 | 2 BPJS | 1 |
| P | 2 | 50 | 1 Ca Mamm    | 1 | 2 | 1 BPJS | 1 |
| P | 2 | 66 | 2 Ca Colorec | 3 | 3 | 2 BPJS | 1 |
| P | 2 | 50 | 1 Ca Colorec | 3 | 4 | 2 BPJS | 1 |
| P | 2 | 33 | 1 Ca Mamm    | 1 | 2 | 1 BPJS | 1 |
| L | 1 | 56 | 1 Ca Colorec | 3 | 4 | 2 BPJS | 1 |
| L | 1 | 21 | 1 Ca Colorec | 3 | 3 | 2 BPJS | 1 |
| P | 2 | 65 | 2 Ca Mamm    | 1 | 4 | 2 BPJS | 1 |
| L | 1 | 44 | 1 Ca Nasofa  | 2 | 4 | 2 BPJS | 1 |
| L | 1 | 58 | 1 Ca Colorec | 3 | 4 | 2 BPJS | 1 |

|   |   |    |              |   |   |        |   |
|---|---|----|--------------|---|---|--------|---|
| L | 1 | 53 | 1 Ca Colorec | 3 | 4 | 2 BPJS | 1 |
| L | 1 | 60 | 1 Ca Colorec | 3 | 4 | 2 BPJS | 1 |
| L | 1 | 51 | 1 Ca Nasofa  | 2 | 4 | 2 BPJS | 1 |
| P | 2 | 60 | 1 Ca Colorec | 3 | 4 | 2 BPJS | 1 |
| P | 2 | 67 | 2 Ca Colorec | 3 | 4 | 2 BPJS | 1 |
| L | 1 | 57 | 1 Ca Colorec | 3 | 3 | 2 BPJS | 1 |
| L | 1 | 48 | 1 Ca Colorec | 3 | 4 | 2 BPJS | 1 |
| L | 1 | 37 | 1 Ca Colorec | 3 | 3 | 2 BPJS | 1 |
| P | 2 | 48 | 1 Ca Nasofa  | 2 | 4 | 2 BPJS | 1 |
| P | 2 | 39 | 1 Ca Mamm    | 1 | 3 | 2 BPJS | 1 |
| P | 2 | 51 | 1 Ca Mamm    | 1 | 4 | 2 BPJS | 1 |
| P | 2 | 58 | 1 Ca Mamm    | 1 | 4 | 2 BPJS | 1 |
| P | 2 | 67 | 2 Ca Mamm    | 1 | 4 | 2 BPJS | 1 |
| P | 2 | 42 | 1 Ca Nasofa  | 2 | 4 | 2 BPJS | 1 |
| P | 2 | 56 | 1 Ca Mamm    | 1 | 3 | 2 BPJS | 1 |
| P | 2 | 24 | 1 Ca Colorec | 3 | 4 | 2 BPJS | 1 |
| L | 1 | 68 | 2 Ca Colorec | 3 | 4 | 2 BPJS | 1 |
| L | 1 | 56 | 1 Ca Colorec | 3 | 4 | 2 BPJS | 1 |
| P | 2 | 37 | 1 Ca Mamm    | 1 | 4 | 2 BPJS | 1 |
| P | 2 | 53 | 1 Ca Mamm    | 1 | 2 | 1 BPJS | 1 |
| P | 2 | 54 | 1 Ca Mamm    | 1 | 4 | 2 BPJS | 1 |
| P | 2 | 53 | 1 Ca Mamm    | 1 | 3 | 2 BPJS | 1 |
| P | 2 | 41 | 1 Ca Mamm    | 1 | 4 | 2 BPJS | 1 |
| L | 1 | 41 | 1 Ca Colorec | 3 | 3 | 2 BPJS | 1 |
| P | 2 | 51 | 1 Ca Mamm    | 1 | 2 | 1 BPJS | 1 |
| P | 2 | 45 | 1 Ca Colorec | 3 | 4 | 2 BPJS | 1 |
| P | 2 | 65 | 2 Ca Colorec | 3 | 4 | 2 BPJS | 1 |
| P | 2 | 48 | 1 Ca Colorec | 3 | 3 | 2 BPJS | 1 |
| P | 2 | 36 | 1 Ca Mamm    | 1 | 3 | 2 BPJS | 1 |
| P | 2 | 36 | 1 Ca Colorec | 3 | 4 | 2 BPJS | 1 |
| P | 2 | 58 | 1 Ca Colorec | 3 | 3 | 2 BPJS | 1 |
| P | 2 | 56 | 1 Ca Mamm    | 1 | 4 | 2 BPJS | 1 |
| P | 2 | 41 | 1 Ca Mamm    | 1 | 2 | 1 BPJS | 1 |
| P | 2 | 48 | 1 Ca Mamm    | 1 | 2 | 1 BPJS | 1 |
| P | 2 | 61 | 2 Ca Mamm    | 1 | 3 | 2 BPJS | 1 |
| P | 2 | 57 | 1 Ca Mamm    | 1 | 3 | 2 BPJS | 1 |
| P | 2 | 51 | 1 Ca Mamm    | 1 | 2 | 1 BPJS | 1 |
| P | 2 | 51 | 1 Ca Mamm    | 1 | 4 | 2 BPJS | 1 |
| P | 2 | 54 | 1 Ca Mamm    | 1 | 4 | 2 BPJS | 1 |
| L | 1 | 29 | 1 Ca Colorec | 3 | 3 | 2 BPJS | 1 |
| P | 2 | 48 | 1 Ca Colorec | 3 | 3 | 2 BPJS | 1 |
| P | 2 | 50 | 1 Ca Mamm    | 1 | 3 | 2 BPJS | 1 |
| P | 2 | 55 | 1 Ca Colorec | 3 | 4 | 2 BPJS | 1 |
| L | 1 | 35 | 1 Ca Colorec | 3 | 3 | 2 BPJS | 1 |
| P | 2 | 54 | 1 Ca Colorec | 3 | 4 | 2 BPJS | 1 |
| P | 2 | 29 | 1 Ca Mamm    | 1 | 2 | 1 BPJS | 1 |
| L | 1 | 25 | 1 Ca Colorec | 3 | 3 | 2 BPJS | 1 |

|   |   |    |              |   |   |        |   |
|---|---|----|--------------|---|---|--------|---|
| L | 1 | 30 | 1 Ca Nasofa  | 2 | 3 | 2 BPJS | 1 |
| P | 2 | 60 | 1 Ca Mamm    | 1 | 1 | 1 BPJS | 1 |
| P | 2 | 58 | 1 Ca Mamm    | 1 | 4 | 2 BPJS | 1 |
| P | 2 | 61 | 2 Ca Nasofa  | 2 | 4 | 2 BPJS | 1 |
| P | 2 | 54 | 1 Ca Colorec | 3 | 4 | 2 BPJS | 1 |
| P | 2 | 38 | 1 Ca Mamm    | 1 | 4 | 2 BPJS | 1 |
| P | 2 | 51 | 1 Ca Mamm    | 1 | 4 | 2 BPJS | 1 |
| P | 2 | 47 | 1 Ca Mamm    | 1 | 3 | 2 BPJS | 1 |
| L | 1 | 49 | 1 Ca Nasofa  | 2 | 3 | 2 BPJS | 1 |
| P | 2 | 65 | 2 Ca Colorec | 3 | 3 | 2 BPJS | 1 |
| P | 2 | 43 | 1 Ca Colorec | 3 | 4 | 2 BPJS | 1 |
| P | 2 | 51 | 1 Ca Colorec | 3 | 3 | 2 BPJS | 1 |
| L | 1 | 62 | 2 Ca Colorec | 3 | 4 | 2 BPJS | 1 |
| L | 1 | 40 | 1 Ca Colorec | 3 | 4 | 2 BPJS | 1 |
| P | 2 | 46 | 1 Ca Mamm    | 1 | 3 | 2 BPJS | 1 |
| L | 1 | 54 | 1 Ca Colorec | 3 | 3 | 2 BPJS | 1 |
| P | 2 | 53 | 1 Ca Mamm    | 1 | 4 | 2 BPJS | 1 |
| P | 2 | 54 | 1 Ca Mamm    | 1 | 2 | 1 BPJS | 1 |
| L | 1 | 21 | 1 Ca Colorec | 3 | 3 | 2 BPJS | 1 |
| L | 1 | 58 | 1 Ca Paru    | 4 | 3 | 2 BPJS | 1 |
| L | 1 | 43 | 1 Ca Paru    | 4 | 4 | 2 BPJS | 1 |
| L | 1 | 62 | 2 Ca Paru    | 4 | 4 | 2 BPJS | 1 |
| L | 1 | 50 | 1 Ca Paru    | 4 | 0 | 0 BPJS | 1 |
| L | 1 | 49 | 1 Ca Paru    | 4 | 0 | 0 BPJS | 1 |
| L | 1 | 49 | 1 Ca Paru    | 4 | 4 | 2 BPJS | 1 |
| P | 2 | 66 | 2 Ca Paru    | 4 | 0 | 0 BPJS | 1 |
| P | 2 | 49 | 1 Ca Paru    | 4 | 0 | 0 BPJS | 1 |
| L | 1 | 58 | 1 Ca Paru    | 4 | 0 | 0 BPJS | 1 |
| L | 1 | 64 | 2 Ca Paru    | 4 | 0 | 0 BPJS | 1 |
| L | 1 | 41 | 1 Ca Paru    | 4 | 0 | 0 BPJS | 1 |
| P | 2 | 56 | 1 Ca Limfor  | 5 | 0 | 0 BPJS | 1 |
| L | 1 | 61 | 2 Ca Limfor  | 5 | 0 | 0 BPJS | 1 |
| L | 1 | 17 | 1 Ca Limfor  | 5 | 4 | 2 BPJS | 1 |
| L | 1 | 66 | 2 Ca Limfor  | 5 | 0 | 0 BPJS | 1 |
| L | 1 | 49 | 1 Ca Limfor  | 5 | 0 | 0 BPJS | 1 |
| P | 2 | 21 | 1 Ca Limfor  | 5 | 0 | 0 BPJS | 1 |
| P | 2 | 36 | 1 Ca Limfor  | 5 | 0 | 0 BPJS | 1 |
| P | 2 | 52 | 1 Ca Limfor  | 5 | 0 | 0 BPJS | 1 |
| L | 1 | 48 | 1 Ca Limfor  | 5 | 0 | 0 BPJS | 1 |
| P | 2 | 57 | 1 Ca Limfor  | 5 | 0 | 0 BPJS | 1 |
| L | 1 | 64 | 2 Ca Limfor  | 5 | 0 | 0 BPJS | 1 |
| P | 2 | 50 | 1 Ca Limfor  | 5 | 0 | 0 BPJS | 1 |
| P | 2 | 56 | 1 Ca Limfor  | 5 | 0 | 0 BPJS | 1 |
| L | 1 | 44 | 1 Ca Limfor  | 5 | 0 | 0 BPJS | 1 |
| L | 1 | 56 | 1 Ca Limfor  | 5 | 0 | 0 BPJS | 1 |
| L | 1 | 68 | 2 Ca Limfor  | 5 | 0 | 0 BPJS | 1 |
| P | 2 | 52 | 1 Ca Ovariu  | 6 | 0 | 0 BPJS | 1 |

|   |   |    |             |    |   |        |   |
|---|---|----|-------------|----|---|--------|---|
| P | 2 | 28 | 1 Ca Ovariu | 6  | 3 | 2 BPJS | 1 |
| P | 2 | 58 | 1 Ca Ovariu | 6  | 3 | 2 BPJS | 1 |
| P | 2 | 53 | 1 Ca Ovariu | 6  | 0 | 0 BPJS | 1 |
| P | 2 | 52 | 1 Ca Ovariu | 6  | 0 | 0 BPJS | 1 |
| P | 2 | 47 | 1 Ca Ovariu | 6  | 2 | 1 BPJS | 1 |
| P | 2 | 55 | 1 Ca Ovariu | 6  | 3 | 2 BPJS | 1 |
| P | 2 | 45 | 1 Ca Ovariu | 6  | 3 | 2 BPJS | 1 |
| P | 2 | 55 | 1 Ca Ovariu | 6  | 3 | 2 BPJS | 1 |
| P | 2 | 42 | 1 Ca Endor  | 7  | 0 | 0 BPJS | 1 |
| P | 2 | 54 | 1 Ca Endor  | 7  | 3 | 2 BPJS | 1 |
| P | 2 | 34 | 1 Ca Fibrob | 8  | 0 | 0 BPJS | 1 |
| P | 2 | 46 | 1 Ca Fibrob | 8  | 0 | 0 BPJS | 1 |
| P | 2 | 22 | 1 Ca Fibrob | 8  | 0 | 0 BPJS | 1 |
| P | 2 |    | 1 Ca Fibrob | 8  | 0 | 0 BPJS | 1 |
| P | 2 | 55 | 1 Ca Fibrob | 8  | 0 | 0 KIS  | 1 |
| P | 2 | 54 | 1 Ca Fibrob | 8  | 0 | 0 BPJS | 1 |
| P | 2 | 31 | 1 Ca Fibrob | 8  | 0 | 0 BPJS | 1 |
| P | 2 | 55 | 1 Ca Axilla | 9  | 0 | 0 BPJS | 1 |
| L | 1 | 52 | 1 Ca Laring | 10 | 0 | 0 BPJS | 1 |
| L | 1 | 60 | 1 Ca Bulli  | 11 | 0 | 0 BPJS | 1 |
| L | 1 | 62 | 2 Ca Bulli  | 11 | 0 | 0 BPJS | 1 |
| L | 1 | 63 | 2 Ca Bulli  | 11 | 0 | 0 BPJS | 1 |
| L | 1 | 62 | 2 Ca Bulli  | 11 | 0 | 0 BPJS | 1 |
| P | 2 | 58 | 1 Ca Urothe | 12 | 0 | 0 BPJS | 1 |
| L | 1 | 65 | 2 Ca Nasof  | 2  | 0 | 0 BPJS | 1 |
| L | 1 | 54 | 1 Ca Nasof  | 2  | 0 | 0 BPJS | 1 |
| P | 2 | 46 | 1 Ca Nasof  | 2  | 0 | 0 BPJS | 1 |
| L | 1 | 41 | 1 Ca Nasof  | 2  | 0 | 0 BPJS | 1 |
| L | 1 | 61 | 2 Ca Nasof  | 2  | 0 | 0 BPJS | 1 |
| L | 1 | 25 | 1 Ca Nasof  | 2  | 0 | 0 BPJS | 1 |
| L | 1 | 51 | 1 Ca Kulit  | 13 | 0 | 0 BPJS | 1 |
| L | 1 | 67 | 2 Ca Kulit  | 13 | 0 | 0 BPJS | 1 |
| L | 1 | 51 | 1 Ca Kulit  | 13 | 0 | 0 BPJS | 1 |
| L | 1 | 43 | 1 Ca Mandi  | 14 | 1 | 1 BPJS | 1 |
| L | 1 | 59 | 1 Ca Omen   | 15 | 0 | 2 BPJS | 1 |
| L | 1 | 34 | 1 Ca Sarko  | 16 | 0 | 0 BPJS | 1 |
| P | 2 | 52 | 1 Ca Sinona | 17 | 0 | 0 BPJS | 1 |
| P | 2 | 46 | 1 Ca Sinona | 17 | 0 | 0 BPJS | 1 |
| L | 1 | 62 | 2 Ca Sinona | 17 | 0 | 0 BPJS | 1 |
| L | 1 | 66 | 2 Ca Lidah  | 18 | 0 | 0 BPJS | 1 |
| L | 1 | 72 | 2 Ca Colli  | 19 | 0 | 0 BPJS | 1 |
| P | 2 | 49 | 1 Ca Colli  | 19 | 0 | 0 BPJS | 1 |
| P | 2 | 54 | 1 Ca Meser  | 20 | 0 | 0 BPJS | 1 |
| L | 1 | 38 | 1 Ca Testis | 21 | 0 | 0 BPJS | 1 |
| P | 2 | 50 | 1 Ca Lemal  | 22 | 0 | 0 BPJS | 1 |
| P | 2 | 35 | 1 Ca Jejenu | 23 | 0 | 0 BPJS | 1 |
| P | 2 | 52 | 1 Ca Palatu | 24 | 0 | 0 BPJS | 1 |



|   |   |    |             |    |   |        |   |
|---|---|----|-------------|----|---|--------|---|
| L | 1 | 65 | 2 Ca Colore | 3  | 0 | 0 BPJS | 1 |
| P | 2 |    | 1 Ca Colore | 3  | 0 | 0 BPJS | 1 |
| P | 2 | 59 | 1 Ca Colon  | 25 | 0 | 0 BPJS | 1 |
| L | 1 | 72 | 2 Ca Colon  | 25 | 4 | 2 BPJS | 1 |
| P | 2 | 25 | 1 Ca Colon  | 25 | 0 | 0 BPJS | 1 |
| L | 1 | 37 | 1 Ca Colon  | 25 | 0 | 0 BPJS | 1 |
| L | 1 | 44 | 1 Ca Colon  | 25 | 0 | 0 BPJS | 1 |
| P | 2 | 65 | 2 Ca Colon  | 25 | 0 | 0 BPJS | 1 |
| P | 2 | 47 | 1 Ca Colon  | 25 | 0 | 0 BPJS | 1 |
| L | 1 | 69 | 2 Ca Colon  | 25 | 0 | 0 BPJS | 1 |
| L | 1 | 65 | 2 Ca Colon  | 25 | 0 | 0 BPJS | 1 |
| P | 2 | 40 | 1 Ca Colon  | 25 | 0 | 0 BPJS | 1 |
| P | 2 | 51 | 1 Ca Colon  | 25 | 0 | 0 BPJS | 1 |
| P | 2 | 53 | 1 Ca Colon  | 25 | 0 | 0 BPJS | 1 |
| P | 2 | 55 | 1 Ca Colon  | 25 | 0 | 0 BPJS | 1 |
| L | 1 | 41 | 1 Ca Colon  | 25 | 0 | 0 BPJS | 1 |
| L | 1 | 49 | 1 Ca Colon  | 25 | 0 | 0 BPJS | 1 |
| P | 2 | 44 | 1 Ca Colon  | 25 | 0 | 0 BPJS | 1 |
| L | 1 | 49 | 1 Ca Colon  | 25 | 0 | 0 BPJS | 1 |
| P | 2 | 43 | 1 Ca Colon  | 25 | 0 | 0 BPJS | 1 |
| L | 1 | 44 | 1 Ca Colon  | 25 | 0 | 0 BPJS | 1 |
| P | 2 | 64 | 2 Ca Colon  | 25 | 0 | 0 BPJS | 1 |
| P | 2 | 48 | 1 Ca Rektu  | 26 | 0 | 0 BPJS | 1 |
| L | 1 | 71 | 2 Ca Rektu  | 26 | 0 | 0 BPJS | 1 |
| P | 2 | 31 | 1 Ca Rektu  | 26 | 0 | 0 BPJS | 1 |
| L | 1 | 53 | 1 Ca Rektu  | 26 | 0 | 0 BPJS | 1 |
| P | 2 | 46 | 1 Ca Rektu  | 26 | 0 | 0 BPJS | 1 |
| L | 1 | 44 | 1 Ca Rektu  | 26 | 0 | 0 BPJS | 1 |
| P | 2 | 57 | 1 Ca Rektu  | 26 | 0 | 0 BPJS | 1 |
| P | 2 | 44 | 1 Ca Rektu  | 26 | 0 | 0 BPJS | 1 |
| P | 2 | 64 | 2 Ca Rektu  | 26 | 0 | 0 BPJS | 1 |
| L | 1 | 63 | 2 Ca Rektu  | 26 | 0 | 0 BPJS | 1 |
| P | 2 | 50 | 1 Ca Rektu  | 26 | 0 | 0 BPJS | 1 |
| P | 2 | 42 | 1 Ca Rektu  | 26 | 0 | 0 BPJS | 1 |
| L | 1 | 35 | 1 Ca Rektu  | 26 | 0 | 0 BPJS | 1 |
| L | 1 | 40 | 1 Ca Rektu  | 26 | 0 | 0 BPJS | 1 |
| P | 2 | 64 | 2 Ca Rektu  | 26 | 0 | 0 BPJS | 1 |
| P | 2 | 58 | 1 Ca Rektu  | 26 | 0 | 0 BPJS | 1 |
| P | 2 | 66 | 2 Ca Rektu  | 26 | 0 | 0 BPJS | 1 |
| P | 2 | 42 | 1 Ca Mamn   | 1  | 0 | 0 BPJS | 1 |
| P | 2 | 49 | 1 Ca Mamn   | 1  | 0 | 0 BPJS | 1 |
| P | 2 | 38 | 1 Ca Mamn   | 1  | 0 | 0 BPJS | 1 |
| P | 2 | 73 | 2 Ca Mamn   | 1  | 2 | 1 BPJS | 1 |
| P | 2 | 43 | 1 Ca Mamn   | 1  | 3 | 2 BPJS | 1 |
| P | 2 | 43 | 1 Ca Mamn   | 1  | 0 | 0 BPJS | 1 |
| P | 2 | 56 | 1 Ca Mamn   | 1  | 1 | 1 BPJS | 1 |

|   |   |    |             |    |   |        |   |
|---|---|----|-------------|----|---|--------|---|
| P | 2 | 56 | 1 Ca Mamn   | 1  | 3 | 2 BPJS | 1 |
| P | 2 | 37 | 1 Ca Mamn   | 1  | 4 | 2 BPJS | 1 |
| P | 2 | 54 | 1 Ca Mamn   | 1  | 2 | 1 BPJS | 1 |
| P | 2 | 53 | 1 Ca Mamn   | 1  | 0 | 0 BPJS | 1 |
| P | 2 | 42 | 1 Ca Mamn   | 1  | 0 | 0 BPJS | 1 |
| P | 2 | 33 | 1 Ca Mamn   | 1  | 2 | 1 BPJS | 1 |
| P | 2 | 55 | 1 Ca Mamn   | 1  | 2 | 1 BPJS | 1 |
| P | 2 | 54 | 1 Ca Mamn   | 1  | 3 | 2 BPJS | 1 |
| P | 2 | 48 | 1 Ca Mamn   | 1  | 0 | 0 BPJS | 1 |
| P | 2 | 63 | 2 Ca Mamn   | 1  | 0 | 0 BPJS | 1 |
| P | 2 | 60 | 1 Ca Mamn   | 1  | 0 | 0 BPJS | 1 |
| P | 2 | 55 | 1 Ca Mamn   | 1  | 0 | 0 BPJS | 1 |
| P | 2 | 60 | 1 Ca Mamn   | 1  | 0 | 0 BPJS | 1 |
| P | 2 | 57 | 1 Ca Mamn   | 1  | 0 | 0 BPJS | 1 |
| P | 2 | 47 | 1 Ca Mamn   | 1  | 0 | 0 BPJS | 1 |
| P | 2 | 44 | 1 Ca Servik | 27 | 2 | 1 BPJS | 1 |
| P | 2 | 60 | 1 Ca Servik | 27 | 0 | 0 BPJS | 1 |
| P | 2 | 48 | 1 Ca Servik | 27 | 2 | 1 BPJS | 1 |
| P | 2 | 51 | 1 Ca Servik | 27 | 2 | 1 BPJS | 1 |
| P | 2 | 54 | 1 Ca Servik | 27 | 3 | 2 BPJS | 1 |
| P | 2 | 45 | 1 Ca Servik | 27 | 2 | 1 BPJS | 1 |
| P | 2 | 57 | 1 Ca Servik | 27 | 2 | 1 BPJS | 1 |
| P | 2 | 40 | 1 Ca Servik | 27 | 2 | 1 BPJS | 1 |
| P | 2 | 44 | 1 Ca Servik | 27 | 0 | 0 BPJS | 1 |
| P | 2 | 39 | 1 Ca Servik | 27 | 2 | 1 BPJS | 1 |
| P | 2 | 48 | 1 Ca Servik | 27 | 3 | 2 BPJS | 1 |
| P | 2 | 41 | 1 Ca Servik | 27 | 2 | 1 BPJS | 1 |
| P | 2 | 48 | 1 Ca Servik | 27 | 0 | 0 BPJS | 1 |
| P | 2 | 24 | 1 Ca Servik | 27 | 2 | 1 BPJS | 1 |
| P | 2 | 57 | 1 Ca Servik | 27 | 2 | 1 BPJS | 1 |

Pendidikan (education); Pekerjaan (work); bek Status Pernikahan (marriage); Pendapatan (Salary in IDR)

|               |                 |                 |               |   |
|---------------|-----------------|-----------------|---------------|---|
| SMU           | 4 Tidak Bekerja | 2 Menikah       | 1 <Rp 2.500 a | 1 |
| SMU           | 4 Bekerja       | 1 Menikah       | 1 >RP 2.500 b | 2 |
| SMU           | 4 Bekerja       | 1 Menikah       | 1 <Rp 2.500 a | 1 |
| SMU           | 4 Bekerja       | 1 Menikah       | 1 >RP 2.500 b | 2 |
| SLTP          | 3 Bekerja       | 1 Menikah       | 1 <Rp 2.500 a | 1 |
| SMU           | 4 Tidak Bekerja | 2 Menikah       | 1 <Rp 2.500 a | 1 |
| SLTP          | 3 Bekerja       | 1 Menikah       | 1 <Rp 2.500 a | 1 |
| SD            | 2 Tidak Bekerja | 2 Menikah       | 1 <Rp 2.500 a | 1 |
| SMU           | 4 Tidak Bekerja | 2 Menikah       | 1 <Rp 2.500 a | 1 |
| SLTP          | 3 Tidak Bekerja | 2 Menikah       | 1 <Rp 2.500 a | 1 |
| SD            | 2 Bekerja       | 1 Menikah       | 1 <Rp 2.500 a | 1 |
| Tidak Sekolah | 1 Bekerja       | 1 Menikah       | 1 <Rp 2.500 a | 1 |
| S1-S3         | 5 Bekerja       | 1 Tidak Menikah | 2 >RP 2.500 b | 2 |
| SLTP          | 3 Tidak Bekerja | 2 Menikah       | 1 <Rp 2.500 a | 1 |
| S1-S3         | 5 Bekerja       | 1 Tidak Menikah | 2 >RP 2.500 b | 2 |
| D3            | 5 Bekerja       | 1 Menikah       | 1 >RP 2.500 b | 2 |
| SMU           | 4 Tidak Bekerja | 2 Menikah       | 1 <Rp 2.500 a | 1 |
| S1-S3         | 5 Bekerja       | 1 Menikah       | 1 >RP 2.500 b | 2 |
| SLTP          | 3 Tidak Bekerja | 2 Menikah       | 1 <Rp 2.500 a | 1 |
| SMU           | 4 Tidak Bekerja | 2 Menikah       | 1 <Rp 2.500 a | 1 |
| SD            | 2 Bekerja       | 1 Menikah       | 1 <Rp 2.500 a | 1 |
| SLTP          | 3 Bekerja       | 1 Menikah       | 1 <Rp 2.500 a | 1 |
| SMU           | 4 Bekerja       | 1 Menikah       | 1 >RP 2.500 b | 2 |
| SLTP          | 3 Bekerja       | 1 Menikah       | 1 >RP 2.500 b | 2 |
| S1-S3         | 5 Bekerja       | 1 Menikah       | 1 >RP 2.500 b | 2 |
| S1-S3         | 5 Bekerja       | 1 Menikah       | 1 >RP 2.500 b | 2 |
| S1-S3         | 5 Bekerja       | 1 Menikah       | 1 >RP 2.500 b | 2 |
| S1-S3         | 5 Bekerja       | 1 Tidak Menikah | 2 <Rp 2.500 a | 1 |
| SD            | 2 Tidak Bekerja | 2 Menikah       | 1 <Rp 2.500 a | 1 |
| SLTP          | 3 Tidak Bekerja | 2 Tidak Menikah | 2 <Rp 2.500 a | 1 |
| SLTP          | 3 Tidak Bekerja | 2 Tidak Menikah | 2 <Rp 2.500 a | 1 |
| S1-S3         | 5 Bekerja       | 1 Menikah       | 1 >RP 2.500 b | 2 |
| SD            | 2 Tidak Bekerja | 2 Menikah       | 1 >RP 2.500 b | 2 |
| SMU           | 4 Bekerja       | 1 Tidak Menikah | 2 <Rp 2.500 a | 1 |
| SMU           | 4 Tidak Bekerja | 2 Tidak Menikah | 2 <Rp 2.500 a | 1 |
| SLTP          | 3 Tidak Bekerja | 2 Menikah       | 1 <Rp 2.500 a | 1 |
| SD            | 2 Bekerja       | 1 Menikah       | 1 <Rp 2.500 a | 1 |
| SD            | 2 Bekerja       | 1 Tidak Menikah | 2 <Rp 2.500 a | 1 |
| S1-S3         | 5 Bekerja       | 1 Menikah       | 1 >RP 2.500 b | 2 |
| SMU           | 4 Bekerja       | 1 Menikah       | 1 <Rp 2.500 a | 1 |
| SMU           | 4 Bekerja       | 1 Menikah       | 1 <Rp 2.500 a | 1 |
| SMU           | 4 Bekerja       | 1 Menikah       | 1 >RP 2.500 b | 2 |
| SD            | 2 Tidak Bekerja | 2 Menikah       | 1 <Rp 2.500 a | 1 |
| SMU           | 4 Tidak Bekerja | 2 Menikah       | 1 <Rp 2.500 a | 1 |
| SD            | 2 Tidak Bekerja | 2 Menikah       | 1 <Rp 2.500 a | 1 |
| SLTP          | 3 Tidak Bekerja | 2 Tidak Menikah | 2 <Rp 2.500 a | 1 |

|                  |                 |                 |               |   |
|------------------|-----------------|-----------------|---------------|---|
| SMU              | 4 Tidak Bekerja | 2 Menikah       | 1 <Rp 2.500 a | 1 |
| SLTP             | 3 Tidak Bekerja | 2 Menikah       | 1 <Rp 2.500 a | 1 |
| SD               | 2 Bekerja       | 1 Menikah       | 1 <Rp 2.500 a | 1 |
| S1-S3            | 5 Bekerja       | 1 Menikah       | 1 >Rp 2.500 b | 2 |
| S1-S3            | 5 Tidak Bekerja | 2 Menikah       | 1 >Rp 2.500 b | 2 |
| SMU              | 4 Tidak Bekerja | 2 Menikah       | 1 <Rp 2.500 a | 1 |
| S1-S3            | 5 Tidak Bekerja | 2 Menikah       | 1 <Rp 2.500 a | 1 |
| Tidak Sekelompok | 1 Bekerja       | 1 Menikah       | 1 <Rp 2.500 a | 1 |
| SMU              | 4 Bekerja       | 1 Menikah       | 1 >Rp 2.500 b | 2 |
| SMU              | 4 Bekerja       | 1 Menikah       | 1 <Rp 2.500 a | 1 |
| S1-S3            | 5 Bekerja       | 1 Tidak Menikah | 2 >Rp 2.500 b | 2 |
| S1-S3            | 5 Bekerja       | 1 Menikah       | 1 >Rp 2.500 b | 2 |
| SMU              | 4 Tidak Bekerja | 2 Tidak Menikah | 2 <Rp 2.500 a | 1 |
| SLTP             | 3 Tidak Bekerja | 2 Menikah       | 1 <Rp 2.500 a | 1 |
| D3               | 5 Tidak Bekerja | 2 Menikah       | 1 >Rp 2.500 b | 2 |
| SMU              | 4 Tidak Bekerja | 2 Menikah       | 1 >Rp 2.500 b | 2 |
| SMU              | 4 Bekerja       | 1 Tidak Menikah | 2 >Rp 2.500 b | 2 |
| Tidak Sekelompok | 1 Tidak Bekerja | 2 Tidak Menikah | 2 <Rp 2.500 a | 1 |
| S1-S3            | 5 Bekerja       | 1 Menikah       | 1 >Rp 2.500 b | 2 |
| SMU              | 4 Tidak Bekerja | 2 Menikah       | 1 <Rp 2.500 a | 1 |
| SMU              | 4 Tidak Bekerja | 2 Tidak Menikah | 2 <Rp 2.500 a | 1 |
| D3               | 5 Bekerja       | 1 Menikah       | 1 <Rp 2.500 a | 1 |
| SMU              | 4 Tidak Bekerja | 2 Menikah       | 1 <Rp 2.500 a | 1 |
| SMU              | 4 Bekerja       | 1 Tidak Menikah | 2 <Rp 2.500 a | 1 |
| S1-S3            | 5 Bekerja       | 1 Tidak Menikah | 2 <Rp 2.500 a | 1 |
| SD               | 2 Bekerja       | 1 Menikah       | 1 <Rp 2.500 a | 1 |
| SD               | 2 Bekerja       | 1 Menikah       | 1 <Rp 2.500 a | 1 |
| SMU              | 4 Bekerja       | 1 Menikah       | 1 >Rp 2.500 b | 2 |
| SMU              | 4 Bekerja       | 1 Menikah       | 1 <Rp 2.500 a | 1 |
| SD               | 2 Bekerja       | 1 Menikah       | 1 <Rp 2.500 a | 1 |
| D3               | 5 Tidak Bekerja | 2 Menikah       | 1 >Rp 2.500 b | 2 |
| SD               | 2 Bekerja       | 1 Menikah       | 1 <Rp 2.500 a | 1 |
| SMU              | 4 Tidak Bekerja | 2 Menikah       | 1 <Rp 2.500 a | 1 |
| SMU              | 4 Tidak Bekerja | 2 Menikah       | 1 <Rp 2.500 a | 1 |
| SLTP             | 3 Bekerja       | 1 Menikah       | 1 >Rp 2.500 b | 2 |
| S1-S3            | 5 Bekerja       | 1 Menikah       | 1 >Rp 2.500 b | 2 |
| SLTP             | 3 Tidak Bekerja | 2 Menikah       | 1 <Rp 2.500 a | 1 |
| SD               | 2 Tidak Bekerja | 2 Menikah       | 1 <Rp 2.500 a | 1 |
| S1-S3            | 5 Bekerja       | 1 Menikah       | 1 <Rp 2.500 a | 1 |
| SLTP             | 3 Tidak Bekerja | 2 Menikah       | 1 <Rp 2.500 a | 1 |
| SLTP             | 3 Tidak Bekerja | 2 Menikah       | 1 <Rp 2.500 a | 1 |
| SMU              | 4 Tidak Bekerja | 2 Menikah       | 1 <Rp 2.500 a | 1 |
| SD               | 2 Bekerja       | 1 Tidak Menikah | 2 <Rp 2.500 a | 1 |
| SD               | 2 Bekerja       | 1 Menikah       | 1 <Rp 2.500 a | 1 |
| S1-S3            | 5 Tidak Bekerja | 2 Menikah       | 1 >Rp 2.500 b | 2 |
| D3               | 5 Bekerja       | 1 Menikah       | 1 >Rp 2.500 b | 2 |
| SLTP             | 3 Tidak Bekerja | 2 Menikah       | 1 <Rp 2.500 a | 1 |

|       |             |             |               |   |
|-------|-------------|-------------|---------------|---|
| SD    | 2 Bekerja   | 1 Tidak Mer | 2 <RP 2.500 a | 1 |
| SD    | 2 Tidak Bek | 2 Menikah   | 1 <RP 2.500 a | 1 |
| SD    | 2 Tidak Bek | 2 Tidak Mer | 2 >RP 2.500 b | 2 |
| SD    | 2 Bekerja   | 1 Menikah   | 1 <RP 2.500 a | 1 |
| SMU   | 4 Bekerja   | 1 Tidak Mer | 2 <RP 2.500 a | 1 |
| D3    | 5 Tidak Bek | 2 Menikah   | 1 <RP 2.500 a | 1 |
| SD    | 2 Bekerja   | 1 Menikah   | 1 <RP 2.500 a | 1 |
| SMU   | 4 Bekerja   | 1 Menikah   | 1 >RP 2.500 b | 2 |
| S1-S3 | 5 Tidak Bek | 2 Menikah   | 1 >RP 2.500 b | 2 |
| SMU   | 4 Bekerja   | 1 Menikah   | 1 >RP 2.500 b | 2 |
| SMU   | 4 Bekerja   | 1 Menikah   | 1 <RP 2.500 a | 1 |
| S1-S3 | 5 Bekerja   | 1 Menikah   | 1 >RP 2.500 b | 2 |
| SMU   | 4 Bekerja   | 1 Menikah   | 1 <RP 2.500 a | 1 |
| SD    | 2 Tidak Bek | 2 Menikah   | 1 >RP 2.500 b | 2 |
| SD    | 2 Tidak Bek | 2 Menikah   | 1 <RP 2.500 a | 1 |
| SD    | 2 Bekerja   | 1 Menikah   | 1 <RP 2.500 a | 1 |
| SLTP  | 3 Tidak Bek | 2 Menikah   | 1 <RP 2.500 a | 1 |
| SD    | 2 Tidak Bek | 2 Menikah   | 1 <RP 2.500 a | 1 |
| SMU   | 4 Bekerja   | 1 Menikah   | 1 <RP 2.500 a | 1 |
| SMU   | 4 Bekerja   | 1 Tidak Mer | 2 <RP 2.500 a | 1 |
| SMU   | 4 Tidak Bek | 2 Menikah   | 1 >RP 2.500 b | 2 |
| SMU   | 4 Bekerja   | 1 Menikah   | 1 >RP 2.500 b | 2 |
| S1-S3 | 5 Tidak Bek | 2 Menikah   | 1 <RP 2.500 a | 1 |
| D3    | 5 Tidak Bek | 2 Menikah   | 1 <RP 2.500 a | 1 |
| SMU   | 4 Bekerja   | 1 Menikah   | 1 <RP 2.500 a | 1 |
| SD    | 2 Bekerja   | 1 Menikah   | 1 <RP 2.500 a | 1 |
| S1-S3 | 5 Tidak Bek | 2 Menikah   | 1 >RP 2.500 b | 2 |
| SMU   | 4 Bekerja   | 1 Menikah   | 1 >RP 2.500 b | 2 |
| SD    | 2 Bekerja   | 1 Menikah   | 1 <RP 2.500 a | 1 |
| SD    | 2 Tidak Bek | 2 Tidak Mer | 2 <RP 2.500 a | 1 |
| SMU   | 4 Tidak Bek | 2 Menikah   | 1 <RP 2.500 a | 1 |
| SMU   | 4 Tidak Bek | 2 Menikah   | 1 <RP 2.500 a | 1 |
| SMU   | 4 Bekerja   | 1 Menikah   | 1 >RP 2.500 b | 2 |
| SMU   | 4 Tidak Bek | 2 Tidak Mer | 2 >RP 2.500 b | 2 |
| SD    | 2 Tidak Bek | 2 Menikah   | 1 <RP 2.500 a | 1 |
| SD    | 2 Tidak Bek | 2 Menikah   | 1 <RP 2.500 a | 1 |
| SD    | 2 Tidak Bek | 2 Menikah   | 1 <RP 2.500 a | 1 |
| SMU   | 4 Tidak Bek | 2 Menikah   | 1 <RP 2.500 a | 1 |
| SLTP  | 3 Bekerja   | 1 Menikah   | 1 <RP 2.500 a | 1 |
| S1-S3 | 5 Bekerja   | 1 Menikah   | 1 >RP 2.500 b | 2 |
| S1-S3 | 5 Bekerja   | 1 Menikah   | 1 <RP 2.500 a | 1 |
| SD    | 2 Tidak Bek | 2 Menikah   | 1 <RP 2.500 a | 1 |
| S1-S3 | 5 Bekerja   | 1 Menikah   | 1 >RP 2.500 b | 2 |
| SMU   | 4 Tidak Bek | 2 Tidak Mer | 2 <RP 2.500 a | 1 |
| SMU   | 4 Tidak Bek | 2 Menikah   | 1 <RP 2.500 a | 1 |
| SD    | 2 Bekerja   | 1 Menikah   | 1 <RP 2.500 a | 1 |
| S1-S3 | 5 Bekerja   | 1 Menikah   | 1 >RP 2.500 b | 2 |

|           |             |             |               |   |
|-----------|-------------|-------------|---------------|---|
| SMU       | 4 Bekerja   | 1 Menikah   | 1 <RP 2.500 a | 1 |
| SMU       | 4 Bekerja   | 1 Menikah   | 1 >RP 2.500 b | 2 |
| SLTP      | 3 Bekerja   | 1 Tidak Mer | 2 <Rp 2.500 a | 1 |
| SMU       | 4 Tidak Bek | 2 Menikah   | 1 >RP 2.500 b | 2 |
| SLTP      | 3 Tidak Bek | 2 Menikah   | 1 <Rp 2.500 a | 1 |
| SD        | 2 Tidak Bek | 2 Menikah   | 1 <Rp 2.500 a | 1 |
| Tidak Sek | 1 Tidak Bek | 2 Menikah   | 1 >RP 2.500 b | 2 |
| SD        | 2 Tidak Bek | 2 Menikah   | 1 <Rp 2.500 a | 1 |
| S1-S3     | 5 Bekerja   | 1 Menikah   | 1 >RP 2.500 b | 2 |
| SD        | 2 Tidak Bek | 2 Menikah   | 1 <Rp 2.500 a | 1 |
| SMU       | 4 Tidak Bek | 2 Menikah   | 1 <Rp 2.500 a | 1 |
| SMU       | 4 Bekerja   | 1 Menikah   | 1 >RP 2.500 b | 2 |
| SMU       | 4 Bekerja   | 1 Menikah   | 1 >RP 2.500 b | 2 |
| SMU       | 4 Tidak Bek | 2 Menikah   | 1 <Rp 2.500 a | 1 |
| SD        | 2 Tidak Bek | 2 Tidak Mer | 2 <Rp 2.500 a | 1 |
| S1-S3     | 5 Tidak Bek | 2 Tidak Mer | 2 <Rp 2.500 a | 1 |
| SD        | 2 Tidak Bek | 2 Tidak Mer | 2 <Rp 2.500 a | 1 |
| S1-S3     | 5 Bekerja   | 1 Menikah   | 1 >RP 2.500 b | 2 |
| SLTP      | 3 Tidak Bek | 2 Menikah   | 1 <Rp 2.500 a | 1 |
| SMU       | 4 Tidak Bek | 2 Menikah   | 1 >RP 2.500 b | 2 |
| SMU       | 4 Tidak Bek | 2 Menikah   | 1 <Rp 2.500 a | 1 |
| SMU       | 4 Tidak Bek | 2 Menikah   | 1 >RP 2.500 b | 2 |
| SLTP      | 3 Tidak Bek | 2 Menikah   | 1 <Rp 2.500 a | 1 |
| S1-S3     | 5 Bekerja   | 1 Menikah   | 1 >RP 2.500 b | 2 |
| S1-S3     | 5 Bekerja   | 1 Menikah   | 1 >RP 2.500 b | 2 |
| SMU       | 4 Bekerja   | 1 Menikah   | 1 >RP 2.500 b | 2 |
| S1-S3     | 5 Tidak Bek | 2 Menikah   | 1 >Rp 2.500 b | 2 |
| SD        | 2 Bekerja   | 1 Menikah   | 1 <RP 2.500 a | 1 |
| SD        | 2 Bekerja   | 1 Menikah   | 1 <Rp 2.500 a | 1 |
| SD        | 2 Tidak Bek | 2 Menikah   | 1 <RP 2.500 a | 1 |
| SLTP      | 3 Tidak Bek | 2 Menikah   | 1 <Rp 2.500 a | 1 |
| SMU       | 4 Tidak Bek | 2 Menikah   | 1 <Rp 2.500 a | 1 |
| SLTP      | 3 Tidak Bek | 2 Menikah   | 1 >Rp 2.500 b | 2 |
| SLTP      | 3 Tidak Bek | 2 Menikah   | 1 <Rp 2.500 a | 1 |
| SLTP      | 3 Bekerja   | 1 Menikah   | 1 <Rp 2.500 a | 1 |
| Tidak Sek | 1 Bekerja   | 1 Menikah   | 1 <Rp 2.500 a | 1 |
| SMU       | 4 Tidak Bek | 2 Tidak Mer | 2 <Rp 2.500 a | 1 |
| SLTP      | 3 Tidak Bek | 2 Tidak Mer | 2 <Rp 2.500 a | 1 |
| S1-S3     | 5 Bekerja   | 1 Menikah   | 1 >Rp 2.500 b | 2 |
| SLTP      | 3 Tidak Bek | 2 Menikah   | 1 <Rp 2.500 a | 1 |
| SLTP      | 3 Tidak Bek | 2 Tidak Mer | 2 <Rp 2.500 a | 1 |
| SD        | 2 Bekerja   | 1 Menikah   | 1 <Rp 2.500 a | 1 |
| SD        | 2 Bekerja   | 1 Menikah   | 1 <Rp 2.500 a | 1 |
| SMU       | 4 Tidak Bek | 2 Tidak Mer | 2 >RP 2.500 b | 2 |
| SD        | 2 Bekerja   | 1 Menikah   | 1 <Rp 2.500 a | 1 |
| S1-S3     | 5 Bekerja   | 1 Menikah   | 1 >RP 2.500 b | 2 |
| SMU       | 4 Tidak Bek | 2 Tidak Mer | 2 <Rp 2.500 a | 1 |

|                  |                 |                 |               |   |
|------------------|-----------------|-----------------|---------------|---|
| SD               | 2 Bekerja       | 1 Menikah       | 1 <RP 2.500 a | 1 |
| SD               | 2 Tidak Bekerja | 2 Menikah       | 1 <RP 2.500 a | 1 |
| SMU              | 4 Bekerja       | 1 Menikah       | 1 <RP 2.500 a | 1 |
| SD               | 2 Bekerja       | 1 Menikah       | 1 <RP 2.500 a | 1 |
| S1-S3            | 5 Tidak Bekerja | 2 Menikah       | 1 <RP 2.500 a | 1 |
| SD               | 2 Bekerja       | 1 Tidak Menikah | 2 <RP 2.500 a | 1 |
| SD               | 2 Bekerja       | 1 Menikah       | 1 >RP 2.500 b | 2 |
| SMU              | 4 Tidak Bekerja | 2 Menikah       | 1 <RP 2.500 a | 1 |
| SD               | 2 Tidak Bekerja | 2 Tidak Menikah | 2 <RP 2.500 a | 1 |
| Tidak Sekelompok | 1 Tidak Bekerja | 2 Menikah       | 1 >RP 2.500 b | 2 |
| SD               | 2 Bekerja       | 1 Menikah       | 1 <RP 2.500 a | 1 |
| S1-S3            | 5 Bekerja       | 1 Tidak Menikah | 2 >RP 2.500 b | 2 |
| SD               | 2 Tidak Bekerja | 2 Tidak Menikah | 2 <RP 2.500 a | 1 |
| SLTP             | 3 Tidak Bekerja | 2 Menikah       | 1 <RP 2.500 a | 1 |
| SD               | 2 Tidak Bekerja | 2 Menikah       | 1 <RP 2.500 a | 1 |
| S1-S3            | 5 Tidak Bekerja | 2 Menikah       | 1 >RP 2.500 b | 2 |
| SD               | 2 Tidak Bekerja | 2 Menikah       | 1 <RP 2.500 a | 1 |
| SLTP             | 3 Bekerja       | 1 Tidak Menikah | 2 <RP 2.500 a | 1 |
| Tidak Sekelompok | 1 Bekerja       | 1 Tidak Menikah | 2 <RP 2.500 a | 1 |
| S1-S3            | 5 Bekerja       | 1 Menikah       | 1 >RP 2.500 b | 2 |
| S1-S3            | 5 Tidak Bekerja | 2 Menikah       | 1 <RP 2.500 a | 1 |
| SD               | 2 Tidak Bekerja | 2 Menikah       | 1 <RP 2.500 a | 1 |
| S1-S3            | 5 Tidak Bekerja | 2 Menikah       | 1 <RP 2.500 a | 1 |
| D3               | 5 Tidak Bekerja | 2 Menikah       | 1 >RP 2.500 b | 2 |
| S1-S3            | 5 Bekerja       | 1 Menikah       | 1 <RP 2.500 a | 1 |
| SD               | 2 Bekerja       | 1 Menikah       | 1 <RP 2.500 a | 1 |
| SLTP             | 3 Tidak Bekerja | 2 Menikah       | 1 >RP 2.500 b | 2 |
| Tidak Sekelompok | 1 Bekerja       | 1 Menikah       | 1 <RP 2.500 a | 1 |
| SMU              | 4 Tidak Bekerja | 2 Menikah       | 1 >RP 2.500 b | 2 |
| SMU              | 4 Bekerja       | 1 Menikah       | 1 <RP 2.500 a | 1 |
| SMU              | 4 Bekerja       | 1 Menikah       | 1 <RP 2.500 a | 1 |
| SMU              | 4 Bekerja       | 1 Menikah       | 1 <RP 2.500 a | 1 |
| S1-S3            | 5 Tidak Bekerja | 2 Menikah       | 1 >RP 2.500 b | 2 |
| SD               | 2 Bekerja       | 1 Tidak Menikah | 2 <RP 2.500 a | 1 |
| SD               | 2 Tidak Bekerja | 2 Tidak Menikah | 2 <RP 2.500 a | 1 |
| SMU              | 4 Tidak Bekerja | 2 Tidak Menikah | 2 <RP 2.500 a | 1 |
| SD               | 2 Bekerja       | 1 Menikah       | 1 <RP 2.500 a | 1 |
| SMU              | 4 Tidak Bekerja | 2 Menikah       | 1 <RP 2.500 a | 1 |
| SMU              | 4 Tidak Bekerja | 2 Menikah       | 1 >RP 2.500 b | 2 |
| SD               | 2 Tidak Bekerja | 2 Menikah       | 1 <RP 2.500 a | 1 |
| SD               | 2 Tidak Bekerja | 2 Menikah       | 1 <RP 2.500 a | 1 |
| S1-S3            | 5 Bekerja       | 1 Menikah       | 1 >RP 2.500 b | 2 |
| SD               | 2 Bekerja       | 1 Menikah       | 1 <RP 2.500 a | 1 |
| SMU              | 4 Tidak Bekerja | 2 Tidak Menikah | 2 <RP 2.500 a | 1 |
| Tidak Sekelompok | 1 Tidak Bekerja | 2 Menikah       | 1 <RP 2.500 a | 1 |
| SLTP             | 3 Bekerja       | 1 Menikah       | 1 <RP 2.500 a | 1 |
| SMU              | 4 Bekerja       | 1 Menikah       | 1 <RP 2.500 a | 1 |

|                  |                 |                 |               |   |
|------------------|-----------------|-----------------|---------------|---|
| SMU              | 4 Bekerja       | 1 Menikah       | 1 >RP 2.500 b | 2 |
| S1-S3            | 5 Tidak Bekerja | 2 Menikah       | 1 >RP 2.500 b | 2 |
| SD               | 2 Bekerja       | 1 Menikah       | 1 <RP 2.500 a | 1 |
| SMU              | 4 Tidak Bekerja | 2 Tidak Menikah | 2 >RP 2.500 b | 2 |
| Tidak Sekelompok | 1 Bekerja       | 1 Menikah       | 1 <RP 2.500 a | 1 |
| SD               | 2 Bekerja       | 1 Menikah       | 1 <RP 2.500 a | 1 |
| SMU              | 4 Bekerja       | 1 Menikah       | 1 <RP 2.500 a | 1 |
| SMU              | 4 Tidak Bekerja | 2 Tidak Menikah | 2 <RP 2.500 a | 1 |
| SLTP             | 3 Bekerja       | 1 Menikah       | 1 <Rp 2.500 a | 1 |
| SMU              | 4 Tidak Bekerja | 2 Menikah       | 1 <Rp 2.500 a | 1 |
| SLTP             | 3 Tidak Bekerja | 2 Menikah       | 1 <Rp 2.500 a | 1 |
| SD               | 2 Tidak Bekerja | 2 Menikah       | 1 <Rp 2.500 a | 1 |
| S1-S3            | 5 Tidak Bekerja | 2 Tidak Menikah | 2 >RP 2.500 b | 2 |
| SLTP             | 3 Bekerja       | 1 Tidak Menikah | 2 <Rp 2.500 a | 1 |
| S1-S3            | 5 Bekerja       | 1 Menikah       | 1 >RP 2.500 b | 2 |
| SMU              | 4 Tidak Bekerja | 2 Tidak Menikah | 2 >RP 2.500 b | 2 |
| SMU              | 4 Tidak Bekerja | 2 Menikah       | 1 <Rp 2.500 a | 1 |
| S1-S3            | 5 Bekerja       | 1 Menikah       | 1 >RP 2.500 b | 2 |
| SMU              | 4 Bekerja       | 1 Menikah       | 1 <RP 2.500 a | 1 |
| SD               | 2 Tidak Bekerja | 2 Tidak Menikah | 2 <RP 2.500 a | 1 |
| SMU              | 4 Tidak Bekerja | 2 Menikah       | 1 >RP 2.500 b | 2 |
| SD               | 2 Tidak Bekerja | 2 Menikah       | 1 >RP 2.500 b | 2 |
| S1-S3            | 5 Tidak Bekerja | 2 Menikah       | 1 >RP 2.500 b | 2 |
| S1-S3            | 5 Bekerja       | 1 Menikah       | 1 >RP 2.500 b | 2 |
| SD               | 2 Tidak Bekerja | 2 Menikah       | 1 <RP 2.500 a | 1 |
| D3               | 5 Tidak Bekerja | 2 Menikah       | 1 >RP 2.500 b | 2 |
| SD               | 2 Tidak Bekerja | 2 Menikah       | 1 <RP 2.500 a | 1 |
| SD               | 2 Bekerja       | 1 Menikah       | 1 >RP 2.500 b | 2 |
| SLTP             | 3 Tidak Bekerja | 2 Menikah       | 1 >RP 2.500 b | 2 |
| SMU              | 4 Bekerja       | 1 Menikah       | 1 >RP 2.500 b | 2 |
| SD               | 2 Tidak Bekerja | 2 Menikah       | 1 >RP 2.500 b | 2 |
| SMU              | 4 Tidak Bekerja | 2 Menikah       | 1 >Rp 2.500 b | 2 |
| S1-S3            | 5 Tidak Bekerja | 2 Menikah       | 1 >Rp 2.500 b | 2 |
| SMU              | 4 Bekerja       | 1 Tidak Menikah | 2 >Rp 2.500 b | 2 |
| Tidak Sekelompok | 1 Tidak Bekerja | 2 Tidak Menikah | 2 <RP 2.500 a | 1 |
| SD               | 2 Bekerja       | 1 Menikah       | 1 <RP 2.500 a | 1 |
| SMU              | 4 Bekerja       | 1 Menikah       | 1 >RP 2.500 b | 2 |
| SMU              | 4 Tidak Bekerja | 2 Menikah       | 1 >RP 2.500 b | 2 |
| S1-S3            | 5 Bekerja       | 1 Menikah       | 1 >RP 2.500 b | 2 |
| SMU              | 4 Bekerja       | 1 Tidak Menikah | 2 <RP 2.500 a | 1 |
| SD               | 2 Bekerja       | 1 Menikah       | 1 <RP 2.500 a | 1 |
| S1-S3            | 5 Bekerja       | 1 Menikah       | 1 >RP 2.500 b | 2 |
| SMU              | 4 Bekerja       | 1 Menikah       | 1 <RP 2.500 a | 1 |
| SMU              | 4 Bekerja       | 1 Menikah       | 1 <RP 2.500 a | 1 |
| SLTP             | 3 Tidak Bekerja | 2 Menikah       | 1 <RP 2.500 a | 1 |
| SMU              | 4 Tidak Bekerja | 2 Menikah       | 1 >RP 2.500 b | 2 |
| S1-S3            | 5 Tidak Bekerja | 2 Menikah       | 1 >RP 2.500 b | 2 |



|            |             |             |               |   |
|------------|-------------|-------------|---------------|---|
| SD         | 2 Bekerja   | 1 Menikah   | 1 <RP 2.500 a | 1 |
| SLTP       | 3 Bekerja   | 1 Menikah   | 1 <RP 2.500 a | 1 |
| S1-S3      | 5 Bekerja   | 1 Menikah   | 1 >RP 2.500 b | 2 |
| Tidak Seko | 1 Tidak Bek | 2 Tidak Mer | 2 <RP 2.500 a | 1 |
| SMU        | 4 Tidak Bek | 2 Menikah   | 1 <RP 2.500 a | 1 |
| S1-S3      | 5 Tidak Bek | 2 Menikah   | 1 >RP 2.500 b | 2 |
| SMU        | 4 Bekerja   | 1 Menikah   | 1 >RP 2.500 b | 2 |
| D3         | 5 Tidak Bek | 2 Menikah   | 1 >RP 2.500 b | 2 |
| S1-S3      | 5 Bekerja   | 1 Menikah   | 1 >RP 2.500 b | 2 |
| SMU        | 4 Tidak Bek | 2 Menikah   | 1 <RP 2.500 a | 1 |
| SMU        | 4 Bekerja   | 1 Menikah   | 1 <RP 2.500 a | 1 |
| SLTP       | 3 Tidak Bek | 2 Menikah   | 1 <RP 2.500 a | 1 |
| SD         | 2 Bekerja   | 1 Menikah   | 1 <RP 2.500 a | 1 |
| S1-S3      | 5 Bekerja   | 1 Menikah   | 1 >RP 2.500 b | 2 |
| SLTP       | 3 Bekerja   | 1 Menikah   | 1 <RP 2.500 a | 1 |
| S1-S3      | 5 Bekerja   | 1 Menikah   | 1 >RP 2.500 b | 2 |
| D3         | 5 Tidak Bek | 2 Menikah   | 1 >RP 2.500 b | 2 |
| S1-S3      | 5 Tidak Bek | 2 Menikah   | 1 >RP 2.500 b | 2 |
| D3         | 5 Tidak Bek | 2 Tidak Mer | 2 >RP 2.500 b | 2 |
| SMU        | 4 Tidak Bek | 2 Menikah   | 1 <Rp 2.500 b | 2 |
| S1         | 5 Bekerja   | 1 Menikah   | 1 >RP 2.50 a  | 1 |
| SD         | 2 Tidak Bek | 2 Menikah   | 1 <Rp 2.500 b | 2 |
| SMU        | 4 Tidak Bek | 2 Menikah   | 1 <Rp 2.500 b | 2 |
| SMP        | 3 Bekerja   | 1 Menikah   | 1 <Rp 2.500 b | 2 |
| SMU        | 4 Tidak Bek | 2 Menikah   | 1 <Rp 2.500 b | 2 |
| SD         | 2 Tidak Bek | 2 Menikah   | 1 <Rp 2.500 b | 2 |
| SD         | 2 Tidak Bek | 2 Menikah   | 1 <Rp 2.500 b | 2 |
| Tidak Seko | 1 Bekerja   | 1 Menikah   | 1 <Rp 2.500 b | 2 |
| SD         | 2 Tidak Bek | 2 Menikah   | 1 <Rp 2.500 b | 2 |
| S1         | 5 Bekerja   | 1 Menikah   | 1 >RP 2.50 a  | 1 |
| SD         | 2 Tidak Bek | 2 Menikah   | 1 <Rp 2.500 b | 2 |
| SMU        | 4 Tidak Bek | 2 Menikah   | 1 <Rp 2.500 b | 2 |
| SMU        | 4 Tidak Bek | 2 Tidak Mer | 2 <Rp 2.500 b | 2 |
| SD         | 2 Tidak Bek | 2 Menikah   | 1 <Rp 2.500 b | 2 |
| SMU        | 4 Tidak Bek | 2 Menikah   | 1 <Rp 2.500 b | 2 |
| SMU        | 4 Tidak Bek | 2 Tidak Mer | 2 <Rp 2.500 b | 2 |
| SLTP       | 3 Tidak Bek | 2 Menikah   | 1 <Rp 2.500 b | 2 |
| SD         | 2 Tidak Bek | 2 Menikah   | 1 <Rp 2.500 b | 2 |
| S1         | 5 Bekerja   | 1 Menikah   | 1 >Rp 2.500 b | 2 |
| SMU        | 4 Tidak Bek | 2 Menikah   | 1 <Rp 2.500 b | 2 |
| SD         | 2 Tidak Bek | 2 Menikah   | 1 <Rp 2.500 b | 2 |
| SMU        | 4 Bekerja   | 1 Menikah   | 1 <Rp 2.500 b | 2 |
| SLTP       | 3 Tidak Bek | 2 Menikah   | 1 <Rp 2.500 b | 2 |
| S1         | 5 Tidak Bek | 2 Menikah   | 1 <Rp 2.500 b | 2 |
| SD         | 2 Tidak Bek | 2 Menikah   | 1 <Rp 2.500 b | 2 |
| SD         | 2 Bekerja   | 1 Menikah   | 1 <RP 2.50 b  | 2 |
| SD         | 2 Tidak Bek | 2 Menikah   | 1 <RP 2.50 b  | 2 |

|           |             |           |              |   |
|-----------|-------------|-----------|--------------|---|
| SMU       | 4 Tidak Bek | 2 Menikah | 1 <RP 2.50 b | 2 |
| D3        | 5 Tidak Bek | 2 Menikah | 1 <RP 2.50 b | 2 |
| SD        | 2 Tidak Bek | 2 Menikah | 1 <RP 2.50 b | 2 |
| SMU       | 4 Tidak Bek | 2 Menikah | 1 <RP 2.50 b | 2 |
| SLTP      | 3 Tidak Bek | 2 Menikah | 1 <RP 2.50 b | 2 |
| SLTP      | 3 Tidak Bek | 2 Menikah | 1 <RP 2.50 b | 2 |
| SLTP      | 3 Tidak Bek | 2 Menikah | 1 <RP 2.50 b | 2 |
| S1        | 5 Bekerja   | 1 Menikah | 1 >RP 2.50 a | 1 |
| SD        | 2 Tidak Bek | 2 Menikah | 1 <RP 2.50 b | 2 |
| SD        | 2 Tidak Bek | 2 Menikah | 1 <RP 2.50 b | 2 |
| Tidak Sek | 1 Tidak Bek | 2 Menikah | 1 <RP 2.50 b | 2 |
| SD        | 2 Tidak Bek | 2 Menikah | 1 <RP 2.50 b | 2 |
| SMU       | 4 Tidak Bek | 2 Menikah | 1 <RP 2.50 b | 2 |
| SD        | 2 Tidak Bek | 2 Menikah | 1 <RP 2.50 b | 2 |
| SD        | 2 Tidak Bek | 2 Menikah | 1 <RP 2.50 b | 2 |
| SD        | 2 Tidak Bek | 2 Menikah | 1 <RP 2.50 b | 2 |
| SLTP      | 3 Tidak Bek | 2 Menikah | 1 <RP 2.50 b | 2 |
| SMU       | 4 Bekerja   | 1 Menikah | 1 <RP 2.50 b | 2 |
| SD        | 2 Tidak Bek | 2 Menikah | 1 <RP 2.50 b | 2 |
| SD        | 2 Tidak Bek | 2 Menikah | 1 <RP 2.50 b | 2 |
| SD        | 2 Tidak Bek | 2 Menikah | 1 <RP 2.50 b | 2 |
| SD        | 2 Bekerja   | 1 Menikah | 1 <RP 2.50 b | 2 |
| S1        | 5 Tidak Bek | 2 Menikah | 1 <RP 2.50 b | 2 |
| SD        | 2 Tidak Bek | 2 Menikah | 1 <RP 2.50 b | 2 |
| SD        | 2 Bekerja   | 1 Menikah | 1 <RP 2.50 b | 2 |
| SD        | 2 Tidak Bek | 2 Menikah | 1 <RP 2.50 b | 2 |
| SD        | 2 Tidak Bek | 2 Menikah | 1 <RP 2.50 b | 2 |
| SLTP      | 3 Bekerja   | 1 Menikah | 1 <RP 2.50 b | 2 |
| SD        | 2 Tidak Bek | 2 Menikah | 1 <RP 2.50 b | 2 |
| SMU       | 4 Tidak Bek | 2 Menikah | 1 <RP 2.50 b | 2 |
| SD        | 2 Tidak Bek | 2 Menikah | 1 <Rp 2.50 b | 2 |
| SD        | 2 Tidak Bek | 2 Menikah | 1 <RP 2.50 b | 2 |
| SD        | 2 Tidak Bek | 2 Menikah | 1 <RP 2.50 b | 2 |
| SLTP      | 3 Bekerja   | 1 Menikah | 1 <RP 2.50 b | 2 |
| SMU       | 4 Bekerja   | 1 Menikah | 1 <RP 2.50 b | 2 |
| SD        | 2 Bekerja   | 1 Menikah | 1 <RP 2.50 b | 2 |
| SMU       | 4 Tidak Bek | 2 Menikah | 1 <RP 2.50 b | 2 |
| Tidak Sek | 1 Tidak Bek | 2 Menikah | 1 <RP 2.50 b | 2 |
| SMU       | 4 Tidak Bek | 2 Menikah | 1 <RP 2.50 b | 2 |
| SD        | 2 Tidak Bek | 2 Menikah | 1 <RP 2.50 b | 2 |
| SD        | 2 Tidak Bek | 2 Menikah | 1 <RP 2.50 b | 2 |
| S1        | 5 Bekerja   | 1 Menikah | 1 >RP 2.50 a | 1 |
| SMU       | 4 Tidak Bek | 2 Menikah | 1 <RP 2.50 b | 2 |
| SMU       | 4 Tidak Bek | 2 Menikah | 1 <RP 2.50 b | 2 |
| SD        | 2 Tidak Bek | 2 Menikah | 1 <RP 2.50 b | 2 |
| SLTP      | 3 Tidak Bek | 2 Menikah | 1 <RP 2.50 b | 2 |
| SD        | 2 Tidak Bek | 2 Menikah | 1 <RP 2.50 b | 2 |

|           |             |           |              |   |
|-----------|-------------|-----------|--------------|---|
| SLTP      | 3 Tidak Bek | 2 Menikah | 1 <RP 2.50 b | 2 |
| SD        | 2 Tidak Bek | 2 Menikah | 1 <RP 2.50 b | 2 |
| SD        | 2 Tidak Bek | 2 Menikah | 1 <Rp 2.50 b | 2 |
| SMU       | 4 Tidak Bek | 2 Menikah | 1 <Rp 2.50 b | 2 |
| SMU       | 4 Tidak Bek | 2 Menikah | 1 <Rp 2.50 b | 2 |
| SMU       | 4 Tidak Bek | 2 Menikah | 1 <Rp 2.50 b | 2 |
| SLTP      | 3 Tidak Bek | 2 Menikah | 1 <RP 2.50 b | 2 |
| SD        | 2 Tidak Bek | 2 Menikah | 1 <RP 2.50 b | 2 |
| SD        | 2 Tidak Bek | 2 Menikah | 1 <RP 2.50 b | 2 |
| SMU       | 4 Tidak Bek | 2 Menikah | 1 <RP 2.50 b | 2 |
| SLTP      | 3 Tidak Bek | 2 Menikah | 1 <RP 2.50 b | 2 |
| SLTP      | 3 Tidak Bek | 2 Menikah | 1 <RP 2.50 b | 2 |
| SD        | 2 Tidak Bek | 2 Menikah | 1 <RP 2.50 b | 2 |
| SD        | 2 Tidak Bek | 2 Menikah | 1 <RP 2.50 b | 2 |
| S1-S3     | 5 Tidak Bek | 2 Menikah | 1 <RP 2.50 b | 2 |
| SLTP      | 3 Tidak Bek | 2 Menikah | 1 <RP 2.50 b | 2 |
| SMU       | 4 Tidak Bek | 2 Menikah | 1 <RP 2.50 b | 2 |
| S1-S3     | 5 Tidak Bek | 2 Menikah | 1 <RP 2.50 b | 2 |
| SLTP      | 3 Bekerja   | 1 Menikah | 1 <RP 2.50 b | 2 |
| SD        | 2 Tidak Bek | 2 Menikah | 1 <RP 2.50 b | 2 |
| SD        | 2 Bekerja   | 1 Menikah | 1 <RP 2.50 b | 2 |
| SD        | 2 Tidak Bek | 2 Menikah | 1 <RP 2.50 b | 2 |
| SD        | 2 Tidak Bek | 2 Menikah | 1 <RP 2.50 b | 2 |
| Tidak Sek | 1 Tidak Bek | 2 Menikah | 1 <RP 2.50 b | 2 |
| SMU       | 4 Tidak Bek | 2 Menikah | 1 <RP 2.50 b | 2 |
| SD        | 2 Tidak Bek | 2 Menikah | 1 <RP 2.50 b | 2 |
| Tidak Sek | 1 Tidak Bek | 2 Menikah | 1 <RP 2.50 b | 2 |
| SMU       | 4 Tidak Bek | 2 Menikah | 1 <RP 2.50 b | 2 |
| Tidak Sek | 1 Tidak Bek | 2 Menikah | 1 <RP 2.50 b | 2 |
| SD        | 2 Tidak Bek | 2 Menikah | 1 <RP 2.50 b | 2 |
| SD        | 2 Tidak Bek | 2 Menikah | 1 <RP 2.50 b | 2 |
| SMU       | 4 Tidak Bek | 2 Menikah | 1 <RP 2.50 b | 2 |
| SD        | 2 Tidak Bek | 2 Menikah | 1 <RP 2.50 b | 2 |
| SD        | 2 Tidak Bek | 2 Menikah | 1 <RP 2.50 b | 2 |
| SMU       | 4 Tidak Bek | 2 Menikah | 1 <RP 2.50 b | 2 |
| SMU       | 4 Bekerja   | 1 Menikah | 1 <RP 2.50 b | 2 |
| SD        | 2 Tidak Bek | 2 Menikah | 1 <RP 2.50 b | 2 |
| SD        | 2 Tidak Bek | 2 Menikah | 1 <RP 2.50 b | 2 |
| SLTP      | 3 Tidak Bek | 2 Menikah | 1 <RP 2.50 b | 2 |
| SMU       | 4 Tidak Bek | 2 Menikah | 1 <RP 2.50 b | 2 |
| S1-S3     | 5 Bekerja   | 1 Menikah | 1 >RP 2.50 a | 1 |
| SMU       | 4 Tidak Bek | 2 Menikah | 1 <RP 2.50 b | 2 |
| SD        | 2 Tidak Bek | 2 Menikah | 1 <RP 2.50 b | 2 |
| SLTP      | 3 Tidak Bek | 2 Menikah | 1 <RP 2.50 b | 2 |
| SD        | 2 Tidak Bek | 2 Menikah | 1 <RP 2.50 b | 2 |
| SMU       | 4 Tidak Bek | 2 Menikah | 1 <RP 2.50 b | 2 |

|           |             |           |              |   |
|-----------|-------------|-----------|--------------|---|
| SD        | 2 Tidak Bek | 2 Menikah | 1 <RP 2.50 b | 2 |
| SLTP      | 3 Tidak Bek | 2 Menikah | 1 <RP 2.50 b | 2 |
| SMU       | 4 Tidak Bek | 2 Menikah | 1 <RP 2.50 b | 2 |
| SD        | 2 Tidak Bek | 2 Menikah | 1 <RP 2.50 b | 2 |
| SD        | 2 Tidak Bek | 2 Menikah | 1 <RP 2.50 b | 2 |
| S1-S3     | 5 Bekerja   | 1 Menikah | 1 <RP 2.50 b | 2 |
| SD        | 2 Tidak Bek | 2 Menikah | 1 <RP 2.50 b | 2 |
| SD        | 2 Tidak Bek | 2 Menikah | 1 <RP 2.50 b | 2 |
| SMU       | 4 Tidak Bek | 2 Menikah | 1 <RP 2.50 b | 2 |
| Tidak Sek | 1 Tidak Bek | 2 Menikah | 1 <RP 2.50 b | 2 |
| SD        | 2 Tidak Bek | 2 Menikah | 1 <RP 2.50 b | 2 |
| SD        | 2 Tidak Bek | 2 Menikah | 1 <RP 2.50 b | 2 |
| Tidak Sek | 1 Bekerja   | 1 Menikah | 1 <RP 2.50 b | 2 |
| SMU       | 4 Tidak Bek | 2 Menikah | 1 <RP 2.50 b | 2 |
| D3        | 5 Tidak Bek | 2 Menikah | 1 <RP 2.50 b | 2 |
| SLTP      | 3 Tidak Bek | 2 Menikah | 1 <RP 2.50 b | 2 |
| SD        | 2 Bekerja   | 1 Menikah | 1 <RP 2.50 b | 2 |
| SMU       | 4 Tidak Bek | 2 Menikah | 1 <RP 2.50 b | 2 |
| SD        | 2 Tidak Bek | 2 Menikah | 1 <RP 2.50 b | 2 |
| SD        | 2 Tidak Bek | 2 Menikah | 1 <RP 2.50 b | 2 |
| SD        | 2 Tidak Bek | 2 Menikah | 1 <RP 2.50 b | 2 |
| SMU       | 4 Tidak Bek | 2 Menikah | 1 <RP 2.50 b | 2 |
| SD        | 2 Tidak Bek | 2 Menikah | 1 <RP 2.50 b | 2 |
| S1-S3     | 5 Bekerja   | 1 Menikah | 1 <RP 2.50 b | 2 |
| SD        | 2 Tidak Bek | 2 Menikah | 1 <RP 2.50 b | 2 |
| D3        | 5 Tidak Bek | 2 Menikah | 1 <RP 2.50 b | 2 |
| SD        | 2 Tidak Bek | 2 Menikah | 1 <RP 2.50 b | 2 |
| SMU       | 4 Tidak Bek | 2 Menikah | 1 <RP 2.50 b | 2 |
| SD        | 2 Tidak Bek | 2 Menikah | 1 <RP 2.50 b | 2 |
| SD        | 2 Tidak Bek | 2 Menikah | 1 <RP 2.50 b | 2 |
| SD        | 2 Tidak Bek | 2 Menikah | 1 <RP 2.50 b | 2 |
| SD        | 2 Tidak Bek | 2 Menikah | 1 <RP 2.50 b | 2 |
